10. Gordinier HC: Occlusion of the posterior inferior cerebellar artery, a definite symptom-complex. *Albany Med Annals* 32:585-601, 1911
11. Sjöqvist O: Studies on pain conduction in the trigeminal nerve. *Acta Psychiatr Neurol Scand suppl* 17:1-139, 1938
12. Weinberger LM, Grant FC: Experiences with intramedullary tractotomy. *Arch Neurol Psychiatr* 49:665-682, 1943
13. Raney R, Raney AA, Hunter CR: Treatment of major trigeminal neuralgia through section of the trigeminospinal tract in the medulla. *Am J Surg* 80:11-17, 1950
14. Crosby EC, Yoss RE: The phylogenetic continuity of neural mechanisms as illustrated by the spinal tract of V and its nucleus. *Res Publ Assoc Res Nerv Ment Dis* 33:174-208, 1954
15. Humphrey T: The spinal tract of the trigeminal nerve in human embryos between 7½ and 8½ weeks of menstrual age and its relation to early fetal behavior. *J Comp Neurol* 97:143-210, 1952
16. Humphrey T: The trigeminal nerve in relation to early human fetal activity. *Res Publ Assoc Res Nerv Ment Dis* 33:127-154, 1954
17. Brown JW: The development of subnucleus caudalis of the nucleus of the spinal tract of V. *J Comp Neurol* 110:105-133, 1958
18. Gerard MW: Afferent impulses of the trigeminal nerve. *Arch Neurol Psychiatr* 9: 306-338, 1923
19. Kerr FWL: The ultrastructure of the spinal tract of the trigeminal nerve and the substantia gelatinosa. *Exp Neurol* 16:359-376, 1966
20. Kerr FWL: The fine structure of the subnucleus caudalis of the trigeminal nerve. *Brain Res* 23:129-145, 1970
21. Mosso JA, Kruger L: Spinal trigeminal neurons excited by noxious and thermal stimuli. *Brain Res* 38:206-210, 1972
22. Kruger L, Michel F: A morphological and somatotopic analysis of single unit activity in the trigeminal sensory complex of the cat. *Exp Neurol* 5:139-156, 1962
23. Wall PD: The laminar organization of dorsal horn and effects of descending impulses. *J Physiol* 188:403-423, 1967
24. Kitahata LM, Taub A, Sato I: Lamina-specific suppression of dorsal horn unit activity by nitrous oxide and by hyperventilation. *J Pharmacol Exp Ther* 176:101-108, 1971
25. Olszewski J: On the anatomical and functional organization of the spinal trigeminal nucleus. *J Comp Neurol* 92:401-413, 1950
26. Kerr FWL: The organization of primary afferents in the subnucleus caudalis of the trigeminal: A light and electron microscopic study of degeneration. *Brain Res* 23:147-165, 1970
27. Seibetta CJ, King RB: Hyperpolarizing influence of trigeminal nucleus caudalis on primary afferent preterminals in trigeminal nucleus oralis. *J Neurophysiol* 32: 229-238, 1969
28. Christensen BN, Perl ER: Spinal neurons specifically excited by noxious or thermal stimuli: Marginal zone of the dorsal horn. *J Neurophysiol* 33:293-307, 1970

### Neonatology

**SURGICAL LESIONS AND RESPIRATORY DISTRESS** This is a review of the common surgical lesions which cause respiratory distress in the neonate. Because of the relatively low incidence of these disorders, the hazard of undue delay in the diagnosis of these surgically correctable lesions is always present. Therefore, prompt diagnosis and immediate treatment are necessary for survival. The article is directed toward the radiologist who utilizes various techniques in attempts to diagnose the abnormalities which require surgical correction. The surgical disorders are divided into three categories: first, abnormalities of the extrathoracic airways, such as cleft anal atresia, pharyngeal airway obstruction by retrodisplacement of the tongue, congenital subglottic tracheal stenosis, and subglottic tracheal hemangioma. In the second group are included abnormalities of the intrathoracic major airway causing obstruction, including cystic hygroma, bronchial duplication cyst, esophageal atresia, and tracheoesophageal fistula. Group three consists of lesions causing compression of lung parenchyma, such as pneumoperitoneum. Diagnosis of these various lesions can be made by clinical as well as roentgenologic examination, provided an appropriate study is available. (*Schapiro, R. L., and Evans, E. T.: Surgical Disorders Causing Neonatal Respiratory Distress, Am. J. Roentgenol. Radium. Ther. Nucl. Med.* 114: 305-321, 1972.)
